# Supplementary material
Source: ML conference proceedings conference paper supplement (https://proceedings.neurips.cc/paper_files/paper/2012/hash/edfbe1afcf9246bb0d40eb4d8027d90f-Abstract.html)
Supplement: Supplementary file 1 [file edfbe1afcf9246bb0d40eb4d8027d90f-Supplemental.zip]

Archive with 1 entries (1 files):
- ista_NIPS_supp.pdf
