# Supplementary material
Source: ML conference proceedings conference paper supplement (https://proceedings.neurips.cc/paper_files/paper/2012/hash/edfbe1afcf9246bb0d40eb4d8027d90f-Abstract.html)
Supplement: Supplementary file 1 [file edfbe1afcf9246bb0d40eb4d8027d90f-Supplemental.zip › ista_NIPS_supp.pdf]

## A Supplementary material

### A.1 Lipschitz Continuity of $\nabla f(X)$

**Lemma 2.** For any  $X, Y \in \mathbb{S}_{++}^p$ ,

$$\frac{1}{b^2} \|X - Y\|_2 \leq \|X^{-1} - Y^{-1}\|_2 \leq \frac{1}{a^2} \|X - Y\|_2,$$

where  $a = \min\{\lambda_{\min}(X), \lambda_{\min}(Y)\}$  and  $b = \max\{\lambda_{\max}(X), \lambda_{\max}(Y)\}$ .

*Proof.* To prove the right-hand side inequality, notice that

$$X^{-1} - Y^{-1} = X^{-1}(Y - X)Y^{-1}.$$

Thus,

$$\begin{aligned} \|X^{-1} - Y^{-1}\|_2 &= \|X^{-1}(Y - X)Y^{-1}\|_2 \\ &\leq \|X^{-1}\|_2 \|X - Y\|_2 \|Y^{-1}\|_2 \\ &= \lambda_{\max}(X^{-1}) \lambda_{\max}(Y^{-1}) \|X - Y\|_2 \\ &= \frac{1}{\lambda_{\min}(X)} \frac{1}{\lambda_{\min}(Y)} \|X - Y\|_2 \\ &\leq \frac{1}{a^2} \|X - Y\|_2. \end{aligned}$$

To prove the left inequality, note first that

$$Y - X = X(X^{-1} - Y^{-1})Y.$$

Therefore,

$$\begin{aligned} \|X - Y\|_2 &= \|X(X^{-1} - Y^{-1})Y\|_2 \\ &\leq \|X\|_2 \|X^{-1} - Y^{-1}\|_2 \|Y\|_2 \\ &= \lambda_{\max}(X) \lambda_{\max}(Y) \|X^{-1} - Y^{-1}\|_2 \\ &\leq b^2 \|X^{-1} - Y^{-1}\|_2. \end{aligned}$$

This shows that

$$\|X^{-1} - Y^{-1}\|_2 \geq \frac{1}{b^2} \|X - Y\|_2$$

and concludes the proof.  $\square$

The function  $\nabla f(X) = S - X^{-1}$  is Lipschitz continuous on any compact domain, since for  $X, Y \in \mathbb{S}_{++}^p$  such that  $aI \preceq X, Y \preceq bI$ ,

$$\begin{aligned} \|\nabla f(X) - \nabla f(Y)\|_F &= \|X^{-1} - Y^{-1}\|_F \\ &\leq \sqrt{p} \|X^{-1} - Y^{-1}\|_2 \\ &\leq \frac{\sqrt{p}}{a^2} \|X - Y\|_2 \\ &\leq \frac{\sqrt{p}}{a^2} \|X - Y\|_F. \end{aligned}$$

### A.2 Proof of Theorem 1

We now provide the proof of Theorem 1.

**Lemma 3.** Let  $\Theta_t$  be as in Algorithm 1 and let  $\Theta_\rho^*$  be the optimal point of problem (1). Also, define

$$b := \max\{\lambda_{\max}(\Theta_t), \lambda_{\max}(\Theta_\rho^*)\}, \quad a := \min\{\lambda_{\min}(\Theta_t), \lambda_{\min}(\Theta_\rho^*)\}.$$

Then

$$\|\Theta_{t+1} - \Theta_\rho^*\|_F \leq \max\left\{\left|1 - \frac{\zeta_t}{b^2}\right|, \left|1 - \frac{\zeta_t}{a^2}\right|\right\} \|\Theta_t - \Theta_\rho^*\|_F.$$

*Proof.* By construction in Algorithm 1,

$$\Theta_{t+1} = \eta_{\zeta_t \rho} \left( (\Theta_t - \zeta_t (S - \Theta_t^{-1})) \right)$$

Moreover, as  $\Theta_\rho^*$  is a fixed point of the ISTA iteration [8, Prop. 3.1], it satisfies

$$\Theta_\rho^* = \eta_{\zeta_t \rho} \left( \Theta_\rho^* - \zeta_t (S - (\Theta_\rho^*)^{-1}) \right).$$

The soft-thresholding operator  $\eta_\rho(\cdot)$  is a proximity operator corresponding to  $\rho \|\cdot\|_1$ . Since prox operators are non-expansive [8, Lemma 2.2], it follows that:

$$\begin{aligned} \|\Theta_{t+1} - \Theta_\rho^*\|_F &= \|\eta_{\zeta_t \rho} (\Theta_t - \zeta_t (S - \Theta_t^{-1})) - \eta_{\zeta_t \rho} (\Theta_\rho^* - \zeta_t (S - (\Theta_\rho^*)^{-1}))\|_F \\ &\leq \|\Theta_t - \zeta_t (S - \Theta_t^{-1}) - (\Theta_\rho^* - \zeta_t (S - (\Theta_\rho^*)^{-1}))\|_F \\ &= \|(\Theta_t + \zeta_t \Theta_t^{-1}) - (\Theta_\rho^* + \zeta_t (\Theta_\rho^*)^{-1})\|_F \end{aligned}$$

To bound the latter expression, recall that if  $h : U \subset \mathbb{R}^n \rightarrow \mathbb{R}^m$  is a differentiable mapping, with  $x, y \in U$ , and  $cx + (1-c)y \in U$  for all  $c \in [0, 1]$ , then

$$\|h(x) - h(y)\| \leq \sup_{c \in [0, 1]} \{ \|J_h(cx + (1-c)y)\| \|x - y\| \}$$

where  $J_h(\cdot)$  is the Jacobian of  $h$ . Define  $h_\gamma : \mathbb{S}_{++}^p \rightarrow \mathbb{R}^{p^2}$  by

$$h_\gamma(X) = \text{vec}(X) + \text{vec}(\gamma X^{-1}),$$

where  $\text{vec}(\cdot) : \mathbb{R}^{p \times p} \rightarrow \mathbb{R}^{p^2}$  is the vectorization operator defined by

$$\text{vec}(A) = (A_1, A_2, \dots, A_p)^T$$

with  $A_i$ , the  $i^{\text{th}}$  row of  $A$ . Note that for  $X \in \mathbb{S}_{++}^p$ ,

$$\frac{\partial X}{\partial X} = I_{p^2} \quad \text{and} \quad \frac{\partial X^{-1}}{\partial X} = -X^{-1} \otimes X^{-1},$$

where  $\otimes$  is the Kronecker product and  $I_{p^2}$  is the  $p^2 \times p^2$  identity matrix. Then the Jacobian of  $h_\gamma$  is given by:

$$J_{h_\gamma}(X) = I_{p^2} - \gamma X^{-1} \otimes X^{-1}.$$

Application of the mean value theorem to  $h_{\zeta_t}$  over  $Z_{t,c} = \text{vec}(c\Theta_t + (1-c)\Theta_\rho^*)$ ,  $c \in [0, 1]$  yields

$$\begin{aligned} \|h_{\zeta_t}(\Theta_t) - h_{\zeta_t}(\Theta_\rho^*)\|_F &\leq \sup_c \left\{ \|I_{p^2} - \zeta_t Z_{t,c}^{-1} \otimes Z_{t,c}^{-1}\|_2 \right\} \|\text{vec}(\Theta_t) - \text{vec}(\Theta_\rho^*)\|_2 \\ &= \sup_c \left\{ \|I_{p^2} - \zeta_t Z_{t,c}^{-1} \otimes Z_{t,c}^{-1}\|_2 \right\} \|\Theta_t - \Theta_\rho^*\|_F. \end{aligned}$$

Denoting the eigenvalues of  $Z_{t,c}$  for given values of  $t$  and  $c$  as  $0 < \gamma_1 \leq \gamma_2 \leq \dots \leq \gamma_p$ , the eigenvalues of  $I_{p^2} - \zeta_t Z_{t,c}^{-1} \otimes Z_{t,c}^{-1}$  are  $\{1 - \zeta_t(\gamma_i \gamma_j)^{-1}\}_{i,j=1}^p$ . By Weyl's inequality,

$$\begin{aligned} \gamma_p &= \lambda_{\max}(Z_{t,c}) \leq \max \{ \lambda_{\max}(\Theta_t), \lambda_{\max}(\Theta_\rho^*) \} \\ \gamma_1 &= \lambda_{\min}(Z_{t,c}) \geq \min \{ \lambda_{\min}(\Theta_t), \lambda_{\min}(\Theta_\rho^*) \}, \end{aligned}$$

and therefore

$$\begin{aligned} \lambda_{\min}(I_{p^2} - \zeta_t Z_{t,c}^{-1} \otimes Z_{t,c}^{-1}) &= 1 - \frac{\zeta_t}{\gamma_1^2} \geq 1 - \frac{\zeta_t}{a^2} \\ \lambda_{\max}(I_{p^2} - \zeta_t Z_{t,c}^{-1} \otimes Z_{t,c}^{-1}) &= 1 - \frac{\zeta_t}{\gamma_p^2} \leq 1 - \frac{\zeta_t}{b^2}. \end{aligned}$$

Hence,

$$\sup_c \left\{ \|I_{p^2} - \zeta_t Z_{t,c}^{-1} \otimes Z_{t,c}^{-1}\|_2 \right\} \leq \max \left\{ \left| 1 - \frac{\zeta_t}{b^2} \right|, \left| 1 - \frac{\zeta_t}{a^2} \right| \right\}$$

which completes the proof.  $\square$

It follows from Lemma 3 that Algorithm 1 converges linearly if

$$s_t(\zeta_t) := \max \left\{ \left| 1 - \frac{\zeta_t}{b^2} \right|, \left| 1 - \frac{\zeta_t}{a^2} \right| \right\} \in (0, 1), \forall t. \quad (23)$$

Since the minimum of

$$s(\zeta) = \max \left\{ \left| 1 - \frac{\zeta}{a^2} \right|, \left| 1 - \frac{\zeta}{b^2} \right| \right\}$$

is at  $\zeta = \frac{2}{a^{-2}+b^{-2}}$ , Theorem 1 follows directly from Lemma 3. It now remains to show that the eigenvalues of the G-ISTA iterates remain bounded in eigenvalue. A more general convergence result for strongly convex functions exists in the literature; this result is stated below.

**Theorem 4.** *Let  $f$  be strongly convex with convexity constant  $\mu$ , and  $\nabla f$  be Lipschitz continuous with constant  $L$ . Then for constant step size  $0 < \zeta < \frac{2}{L}$ , the iterates of the ISTA iteration (equation (8)),  $\{x_t\}_{t \geq 0}$  to minimize  $f + g$  as in (4), satisfy*

$$\|x_{t+1} - x^*\|_F \leq \max \{ |1 - \zeta L|, |1 - \zeta \mu| \} \|x_t - x^*\|_F,$$

which is to say that they converge linearly with rate  $\max \{ |1 - \zeta L|, |1 - \zeta \mu| \}$ . Furthermore,

1. The step size which yields an optimal worst-case contraction bound is  $\zeta = \frac{2}{\mu+L}$ .

2. The optimal worst-case contraction bound corresponding to  $\zeta = \frac{2}{\mu+L}$  is given by

$$\begin{aligned} s(\zeta) &:= \max \{ |1 - \zeta L|, |1 - \zeta \mu| \} \\ &= 1 - \frac{2}{1 + \frac{\mu}{L}}. \end{aligned}$$

*Proof.* See [7, 21] and references therein.  $\square$

### A.3 Proof of Theorem 2

In this section, the eigenvalues of  $\Theta_t, \forall t$  are bounded. To begin, the eigenvalues of  $\Theta_{t+\frac{1}{2}} := \Theta_t - \zeta_t(S - \Theta_t^{-1})$  are bounded.

**Lemma 4.** Let  $0 < a < b$  be given positive constants and let  $\zeta_t > 0$ . Assume  $aI \preceq \Theta_t \preceq bI$ . Then the eigenvalues of  $\Theta_{t+\frac{1}{2}} := \Theta_t - \zeta_t(S - \Theta_t^{-1})$  satisfy:

$$\lambda_{\min}(\Theta_{t+\frac{1}{2}}) \geq \begin{cases} 2\sqrt{\zeta_t} - \zeta_t \lambda_{\max}(S) & \text{if } a \leq \sqrt{\zeta_t} \leq b \\ \min \left( a + \frac{\zeta_t}{a}, b + \frac{\zeta_t}{b} \right) - \zeta_t \lambda_{\max}(S) & \text{otherwise} \end{cases} \quad (24)$$

and

$$\lambda_{\max}(\Theta_{t+\frac{1}{2}}) \leq \max \left( a + \frac{\zeta_t}{a}, b + \frac{\zeta_t}{b} \right) - \zeta_t \lambda_{\min}(S).$$

*Proof.* Denoting the eigenvalue decomposition of  $\Theta_t$  by  $\Theta_t = U\Gamma U^T$ ,

$$\begin{aligned} \Theta_{t+\frac{1}{2}} &= \Theta_t - \zeta_t(S - \Theta_t^{-1}) \\ &= U\Gamma U^T - \zeta_t(S - U\Gamma^{-1}U^T) \\ &= U(\Gamma - \zeta_t(U^T S U - \Gamma^{-1}))U^T \end{aligned}$$

Let  $\Gamma = \text{diag}(\gamma_1, \dots, \gamma_p)$  with  $\gamma_1 \leq \dots \leq \gamma_p$ . By Weyl's inequality, the eigenvalues of  $\Theta_{t+\frac{1}{2}}$  are bounded below by

$$\lambda_i \left( \Theta_{t+\frac{1}{2}} \right) \geq \gamma_i + \frac{\zeta_t}{\gamma_i} - \zeta_t \lambda_{\max}(S),$$

and bounded above by

$$\lambda_i \left( \Theta_{t+\frac{1}{2}} \right) \leq \gamma_i + \frac{\zeta_t}{\gamma_i} - \zeta_t \lambda_{\min}(S)$$

The function  $f(x) = x + \frac{\zeta_t}{x}$  over  $a \leq x \leq b$  has only one extremum which is a global minimum at  $x = \sqrt{\zeta_t}$ . Therefore,

$$\min_{a \leq x \leq b} x + \frac{\zeta_t}{x} = \begin{cases} 2\sqrt{\zeta_t} & \text{if } a \leq \sqrt{\zeta_t} \leq b \\ \min\left(a + \frac{\zeta_t}{a}, b + \frac{\zeta_t}{b}\right) & \text{otherwise} \end{cases},$$

and

$$\max_{a \leq x \leq b} x + \frac{\zeta_t}{x} = \max\left(a + \frac{\zeta_t}{a}, b + \frac{\zeta_t}{b}\right).$$

Since  $a \leq \gamma_1 \leq b$ ,

$$\begin{aligned} \lambda_{\min}(\Theta_{t+\frac{1}{2}}) &\geq \gamma_1 + \frac{\zeta_t}{\gamma_1} - \zeta_t \lambda_{\max}(S) \\ &\geq \min_{a \leq x \leq b} \left(x + \frac{\zeta_t}{x}\right) - \zeta_t \lambda_{\max}(S) \\ &= \begin{cases} 2\sqrt{\zeta_t} - \zeta_t \lambda_{\max}(S) & \text{if } a \leq \sqrt{\zeta_t} \leq b \\ \min\left(a + \frac{\zeta_t}{a}, b + \frac{\zeta_t}{b}\right) - \zeta_t \lambda_{\max}(S) & \text{otherwise} \end{cases} \end{aligned}$$

Similarly,

$$\begin{aligned} \lambda_{\max}(\Theta_{t+\frac{1}{2}}) &\leq \gamma_p + \frac{\zeta_t}{\gamma_p} - \zeta_t \lambda_{\min}(S) \\ &\leq \max_{a \leq x \leq b} \left(x + \frac{\zeta_t}{x}\right) - \zeta_t \lambda_{\min}(S) \\ &= \max\left(a + \frac{\zeta_t}{a}, b + \frac{\zeta_t}{b}\right) - \zeta_t \lambda_{\min}(S). \end{aligned}$$

□

It remains to demonstrate that the soft-thresholded iterates  $\Theta_{t+1}$  remain bounded in eigenvalue.

**Lemma 5.** Let  $0 < a < b$  and  $\zeta_t > 0$ . Then:

$$\min\left(a + \frac{\zeta_t}{a}, b + \frac{\zeta_t}{b}\right) = a + \frac{\zeta_t}{a}$$

if and only if  $\zeta_t \leq ab$ .

*Proof.* Under the stated assumptions,

$$\begin{aligned} a + \frac{\zeta_t}{a} \leq b + \frac{\zeta_t}{b} &\Leftrightarrow \zeta_t \left(\frac{1}{a} - \frac{1}{b}\right) \leq b - a \\ &\Leftrightarrow \zeta_t \leq \frac{b - a}{\frac{1}{a} - \frac{1}{b}} \\ &\Leftrightarrow \zeta_t \leq ab. \end{aligned}$$

□

**Lemma 6.** Let  $A$  be a symmetric  $p \times p$  matrix. Then the soft-thresholded matrix  $\eta_\epsilon(A)$  satisfies

$$\lambda_{\min}(A) - p\epsilon \leq \lambda_{\min}(\eta_\epsilon(A))$$

In particular,  $A_\epsilon$  is positive definite if  $\lambda_{\min}(A) > p\epsilon$ .

*Proof.* Let

$$\mathcal{A} := \{M \in \mathbb{M}_p : M_{i,j} \in \{0, 1, -1\}\}.$$

For every  $\epsilon > 0$ , the matrix  $A_\epsilon$  can be written as

$$\eta_\epsilon(A) = A + \epsilon_1 A_1 + \epsilon_2 A_2 + \cdots + \epsilon_k A_k,$$

for some  $k \leq \binom{p}{2} + p$  where  $A_i \in \mathcal{A}$ ,  $\epsilon_i > 0$  and  $\sum_{i=1}^k \epsilon_i = \epsilon$ . Now let

$$c_p := \max\{|\lambda_{\min}(M)| : M \in \mathcal{A}\}.$$

The constant  $c_p$  is finite since  $\mathcal{A}$  is a finite set. Since  $-A \in \mathcal{A}$  for every  $A \in \mathcal{A}$ , and since  $|\lambda_{\min}(-A)| = |\lambda_{\max}(A)|$ , it follows that

$$c_p = \max\{|\lambda_{\max}(M)| : M \in \mathcal{A}\}.$$

Applying the Gershgorin circle theorem [see, e.g., 12] gives  $c_p \leq p$ . Since  $p$  is an eigenvalue of the matrix  $B$  such that  $B_{i,j} = 1$  for all  $i, j$ , it follows that  $c_p = p$ .

Recursive application of Weyl's inequality gives that

$$\begin{aligned} \lambda_{\min}(\eta_\epsilon(A)) &\geq \lambda_{\min}(A) - \epsilon|\lambda_{\max}(A_1)| - \cdots - \epsilon_k|\lambda_{\max}(A_k)| \\ &\geq \lambda_{\min}(A) - c_p \sum_{i=1}^k \epsilon_i \\ &= \lambda_{\min}(A) - c_p \epsilon. \end{aligned}$$

□

Recall from Lemma 1 that the eigenvalues of the optimal solution to problem (1) are bounded below by  $\frac{1}{\|S\|_{2+p\rho}}$ . The following theorem shows that  $\alpha = \frac{1}{\|S\|_{2+p\rho}}$  is a valid bound to ensure that  $\alpha I \preceq \Theta_{t+1}$  if  $\alpha I \preceq \Theta_t$ .

**Lemma 7.** Let  $\rho > 0$  and  $\alpha = \frac{1}{\|S\|_{2+p\rho}} < b'$ . Assume  $\alpha I \preceq \Theta_t \preceq b'$  and consider

$$\Theta_{t+1} = \eta_{\zeta_t \rho}(\Theta_t - \zeta_t(S - \Theta_t^{-1}))$$

Then for every  $0 < \zeta_t \leq \alpha^2$ ,  $\alpha I \preceq \Theta_{t+1}$ .

*Proof.* The result follows by combining Lemma 4 and Lemma 6. Notice first that the hypothesis  $\zeta_t \leq \alpha^2$  guarantees that  $\sqrt{\zeta_t} \notin [\alpha, b']$ . Also, from Lemma 5, we have

$$\min\left(\alpha + \frac{\zeta_t}{\alpha}, b' + \frac{\zeta_t}{b'}\right) = \alpha + \frac{\zeta_t}{\alpha}$$

since  $\zeta_t \leq \alpha^2 \leq \alpha b'$ . Hence, by Lemma 4,

$$\begin{aligned} \lambda_{\min}(\Theta_{t+\frac{1}{2}}) &\geq \min\left(\alpha + \frac{\zeta_t}{\alpha}, b' + \frac{\zeta_t}{b'}\right) - \zeta_t \lambda_{\max}(S) \\ &= \alpha + \frac{\zeta_t}{\alpha} - \zeta_t \lambda_{\max}(S). \end{aligned}$$

Now, applying Lemma 6 to  $\Theta_{t+1} = \eta_{\zeta_t \rho}(\Theta_{t+\frac{1}{2}})$ , we obtain

$$\begin{aligned} \lambda_{\min}(\Theta_{t+1}) &= \lambda_{\min}\left(\eta_{\zeta_t \rho}(\Theta_{t+\frac{1}{2}})\right) \\ &\geq \lambda_{\min}(\Theta_{t+\frac{1}{2}}) - p\rho\zeta_t \\ &\geq \alpha + \frac{\zeta_t}{\alpha} - \zeta_t \lambda_{\max}(S) - p\rho\zeta_t. \end{aligned}$$

We therefore have  $\alpha I \preceq \Theta_{t+1}$  whenever

$$\alpha + \frac{\zeta_t}{\alpha} - \zeta_t \lambda_{\max}(S) - p\rho\zeta_t \geq \alpha.$$

This is equivalent to

$$\zeta_t \left( \frac{1}{\alpha} - \lambda_{\max}(S) - p\rho \right) \geq 0.$$

Since  $\zeta_t > 0$ , this is equivalent to

$$\frac{1}{\alpha} - \lambda_{\max}(S) - p\rho \geq 0.$$

Reorganizing the terms of the previous equation, we obtain that  $\alpha I \preceq \Theta_{t+1}$  if

$$\alpha \leq \frac{1}{\lambda_{\max}(S) + p\rho} = \frac{1}{\|S\|_2 + p\rho}.$$

□

It remains to show that the eigenvalues of the iterates  $\Theta_t$  remain bounded above, for all  $t$ .

**Lemma 8.** Let  $\alpha = \frac{1}{\|S\|_2 + p\rho}$  and let  $\zeta_t \leq \alpha^2, \forall t$ . Then the G-ISTA iterates  $\Theta_t$  satisfy  $\Theta_t \preceq b' I, \forall t$ , with  $b' = \|\Theta_\rho^*\|_2 + \|\Theta_0 - \Theta_\rho^*\|_F$ .

*Proof.* By Lemma 7,  $\alpha I \preceq \Theta_t$  for every  $t$ . As  $\alpha I \preceq \Theta^*$  (Lemma 1),

$$\Lambda_t^- := \min\{\lambda_{\min}(\Theta_t), \lambda_{\min}(\Theta_\rho^*)\}^2 \geq \alpha^2.$$

for all  $t$ . Also, since  $\Lambda_t^+ \geq \Lambda_t^-$  and  $\zeta_t \leq \alpha^2$ ,

$$\max \left\{ \left| 1 - \frac{\zeta_t}{b^2} \right|, \left| 1 - \frac{\zeta_t}{\alpha^2} \right| \right\} \leq 1.$$

Therefore, by Lemma 3,

$$\|\Theta_t - \Theta_\rho^*\|_F \leq \|\Theta_{t-1} - \Theta_\rho^*\|_F.$$

Applying this result recursively gives

$$\|\Theta_t - \Theta_\rho^*\|_F \leq \|\Theta_0 - \Theta_\rho^*\|_F.$$

Since  $\|\cdot\|_2 \leq \|\cdot\|_F$ , we therefore have

$$\|\Theta_t\|_2 - \|\Theta_\rho^*\|_2 \leq \|\Theta_t - \Theta_\rho^*\|_2 \leq \|\Theta_t - \Theta_\rho^*\|_F \leq \|\Theta_0 - \Theta_\rho^*\|_F,$$

and so,

$$\lambda_{\max}(\Theta_t) = \|\Theta_t\|_2 \leq \|\Theta_\rho^*\|_2 + \|\Theta_0 - \Theta_\rho^*\|_F$$

which completes the proof. □

#### A.4 Additional timing comparisons

This section provides additional synthetic timing comparisons for  $p = 500$  and  $p = 5000$ . In addition, two real datasets were investigated. The “estrogen” dataset [22] contains  $p = 652$  dimensional gene expression data from  $n = 158$  breast cancer patients. The “temp” dataset [6] consists of average annual temperature measurements from  $p = 1732$  locations over  $n = 157$  years (1850-2006).

| problem                                               | $\rho$                                            | 0.05             | 0.10             | 0.15            | 0.20            |
|-------------------------------------------------------|---------------------------------------------------|------------------|------------------|-----------------|-----------------|
|                                                       | algorithm                                         | time/iter        | time/iter        | time/iter       | time/iter       |
| $p = 500$<br>$n = 100$<br>$\text{nnz}(\Omega) = 3\%$  | $\text{nnz}(\Omega_\rho^*)/\kappa(\Omega_\rho^*)$ | 31.61%/42.76     | 19.61%/18.23     | 11.08%/8.13     | 5.02%/3.06      |
|                                                       | glasso                                            | 28.34/11         | 10.91/8          | 7.08/7          | 5.57/6          |
|                                                       | QUIC                                              | 8.33/23          | 1.98/13          | 0.96/11         | 0.38/10         |
|                                                       | G-ISTA                                            | <b>4.44</b> /402 | <b>1.14</b> /110 | <b>0.30</b> /38 | <b>0.14</b> /18 |
| $p = 500$<br>$n = 600$<br>$\text{nnz}(\Omega) = 3\%$  | $\text{nnz}(\Omega_\rho^*)/\kappa(\Omega_\rho^*)$ | 20.73%/6.62      | 3.93%/2.44       | 0.90%/1.49      | 0.13%/1.20      |
|                                                       | glasso                                            | 7.44/6           | 4.53/5           | 3.45/4          | 2.62/3          |
|                                                       | QUIC                                              | 1.08/9           | 0.17/7           | <b>0.06</b> /5  | 0.04/5          |
|                                                       | G-ISTA                                            | <b>0.28</b> /31  | <b>0.10</b> /13  | 0.07/9          | <b>0.03</b> /5  |
| $p = 500$<br>$n = 100$<br>$\text{nnz}(\Omega) = 15\%$ | $\text{nnz}(\Omega_\rho^*)/\kappa(\Omega_\rho^*)$ | 31.36%/46.83     | 19.74%/19.93     | 11.65%/8.95     | 5.45%/3.25      |
|                                                       | glasso                                            | 28.61/11         | 11.27/8          | 7.22/7          | 5.34/6          |
|                                                       | QUIC                                              | 8.47/23          | 2.01/13          | 0.73/9          | 0.22/7          |
|                                                       | G-ISTA                                            | <b>4.80</b> /466 | <b>1.09</b> /115 | <b>0.28</b> /34 | <b>0.15</b> /20 |
| $p = 500$<br>$n = 600$<br>$\text{nnz}(\Omega) = 15\%$ | $\text{nnz}(\Omega_\rho^*)/\kappa(\Omega_\rho^*)$ | 24.81%/9.78      | 6.36%/2.64       | 0.79%/1.28      | 0.03%/1.08      |
|                                                       | glasso                                            | 8.52/6           | 4.59/5           | 3.55/4          | 2.54/3          |
|                                                       | QUIC                                              | 1.56/10          | 0.25/7           | <b>0.05</b> /5  | 0.03/5          |
|                                                       | G-ISTA                                            | <b>0.50</b> /51  | <b>0.10</b> /13  | 0.06/7          | <b>0.02</b> /3  |

Table 2: Timing comparisons for  $p = 500$  dimensional datasets, generated as in Section 5.1

| problem                                                 | $\rho$                                            | 0.02                | 0.04               | 0.06              | 0.08             |
|---------------------------------------------------------|---------------------------------------------------|---------------------|--------------------|-------------------|------------------|
|                                                         | algorithm                                         | time/iter           | time/iter          | time/iter         | time/iter        |
| $p = 5000$<br>$n = 1000$<br>$\text{nnz}(\Omega) = 3\%$  | $\text{nnz}(\Omega_\rho^*)/\kappa(\Omega_\rho^*)$ | 26.22%/54.47        | 13.68%/23.74       | 6.36%/8.69        | 2.03%/2.31       |
|                                                         | glasso                                            | 30814.29/11         | 12612.85/8         | 9224.79/7         | 6184.84/5        |
|                                                         | QUIC                                              | 22547.70/21         | 3725.07/11         | 946.11/8          | 199.48/6         |
|                                                         | G-ISTA                                            | <b>2651.43</b> /575 | <b>417.20</b> /94  | <b>93.33</b> /25  | <b>39.05</b> /11 |
| $p = 5000$<br>$n = 6000$<br>$\text{nnz}(\Omega) = 3\%$  | $\text{nnz}(\Omega_\rho^*)/\kappa(\Omega_\rho^*)$ | 12.89%/15.18        | 3.23%/3.73         | 1.11%/1.60        | 0.16%/1.16       |
|                                                         | glasso                                            | 10307.26/7          | 8725.86/7          | 4846.58/4         | 3587.35/3        |
|                                                         | QUIC                                              | 3108.14/10          | 396.60/7           | 86.66/5           | <b>21.56</b> /4  |
|                                                         | G-ISTA                                            | <b>268.28</b> /70   | <b>50.17</b> /14   | <b>35.67</b> /10  | 28.82/8          |
| $p = 5000$<br>$n = 1000$<br>$\text{nnz}(\Omega) = 15\%$ | $\text{nnz}(\Omega_\rho^*)/\kappa(\Omega_\rho^*)$ | 26.08%/80.04        | 13.93%/37.12       | 6.91%/16.52       | 2.47%/3.08       |
|                                                         | glasso                                            | 36302.86/11         | 13413.57/8         | 9914.41/7         | 7408.33/6        |
|                                                         | QUIC                                              | 22667.29/21         | 4649.99/12         | 1329.20/9         | 240.25/6         |
|                                                         | G-ISTA                                            | <b>3952.85</b> /849 | <b>701.57</b> /170 | <b>176.11</b> /45 | <b>42.46</b> /12 |
| $p = 5000$<br>$n = 6000$<br>$\text{nnz}(\Omega) = 15\%$ | $\text{nnz}(\Omega_\rho^*)/\kappa(\Omega_\rho^*)$ | 18.65%/27.69        | 5.34%/7.26         | 0.66%/1.41        | 0.03%/1.09       |
|                                                         | glasso                                            | 13180.47/7          | 9052.77/7          | 4842.28/4         | 3578.05/3        |
|                                                         | QUIC                                              | 6600.91/12          | 795.46/8           | 59.03/5           | <b>16.10</b> /4  |
|                                                         | G-ISTA                                            | <b>804.93</b> /189  | <b>103.69</b> /23  | <b>36.17</b> /10  | 18.87/5          |

Table 3: Timing comparisons for  $p = 5000$  dimensional datasets, generated as in Section 5.1.

| problem                                            | $\rho$                                            | 0.15              | 0.30              | 0.45            | 0.60            |
|----------------------------------------------------|---------------------------------------------------|-------------------|-------------------|-----------------|-----------------|
|                                                    | algorithm                                         | time/iter         | time/iter         | time/iter       | time/iter       |
| $p = 682$<br>$n = 158$<br><i>Dataset: estrogen</i> | $\text{nnz}(\Omega_\rho^*)/\kappa(\Omega_\rho^*)$ | 5.29%/290.03      | 3.39%/88.55       | 2.31%/29.69     | 1.63%/8.96      |
|                                                    | glasso                                            | 106.18/24         | 120.18/34         | 110.54/35       | 40.52/13        |
|                                                    | QUIC                                              | <b>12.36</b> /19  | <b>2.71</b> /11   | <b>1.08</b> /9  | <b>0.54</b> /7  |
|                                                    | G-ISTA                                            | 43.96/2079        | 11.99/595         | 3.23/172        | 1.00/53         |
| problem                                            | $\rho$                                            | 0.2               | 0.4               | 0.6             | 0.8             |
|                                                    | algorithm                                         | time/iter         | time/iter         | time/iter       | time/iter       |
| $p = 1732$<br>$n = 157$<br><i>Dataset: temp</i>    | $\text{nnz}(\Omega_\rho^*)/\kappa(\Omega_\rho^*)$ | 2.02%/1075.8      | 1.77%/289.63      | 1.34%/23.02     | 0.22%/2.10      |
|                                                    | glasso                                            | 1919.64/31        | 2535.86/46        | 1144.07/22      | 254.14/5        |
|                                                    | QUIC                                              | <b>497.47</b> /18 | <b>103.76</b> /13 | <b>10.16</b> /8 | 2.31/7          |
|                                                    | G-ISTA                                            | 1221.40/6194      | 183.20/819        | 30.01/159       | <b>1.78</b> /10 |

Table 4: Timing comparisons for the real datasets described above.
